# Supplementary material for: Design of Novel Functional Conductive Structures and Preparation of High-Hole-Mobility Polymer Transistors by Green Synthesis Using Acceptor–Donor–Acceptor Strategies
Source: MDPI journal article supplement (doi:10.3390/polym16030396), 2024-01-31

## Supplementary Materials

**Figure S1.**  $^1\text{H}$  NMR spectrum for compound B.

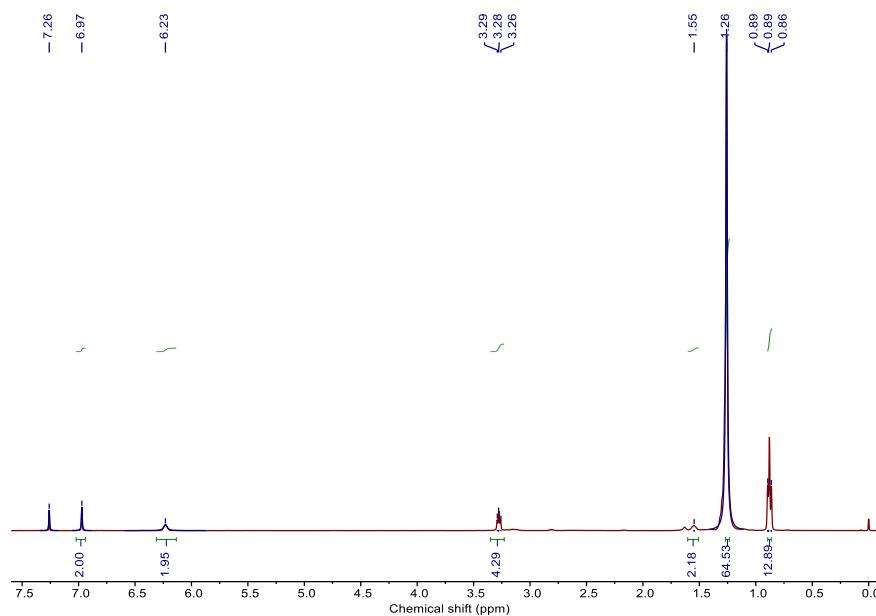

$^1\text{H}$  NMR (400 MHz,  $\text{CDCl}_3$ , ppm): 6.97 (s, 2H), 6.23 (br, 2H), 3.28 (t,  $J = 5.9$  Hz, 4H), 1.60–1.49 (m, 2H), 1.36–1.11 (m, 64H), 0.89 (t,  $J = 6.7$  Hz, 12H).

**Figure S2.**  $^{13}\text{C}$  NMR spectrum for compound B.

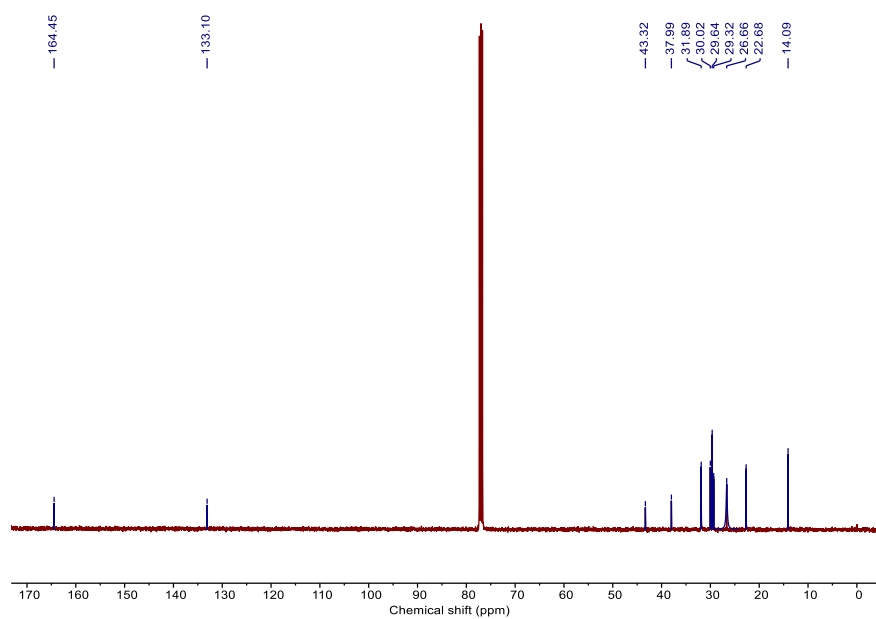

$^{13}\text{C}$  NMR (100 MHz,  $\text{CDCl}_3$ , ppm): 164.45, 133.10, 43.32, 37.99, 31.89, 30.02, 29.64, 29.32, 26.66, 22.68, 14.09.

**Figure S3.**  $^1\text{H}$  NMR spectrum for compound C.

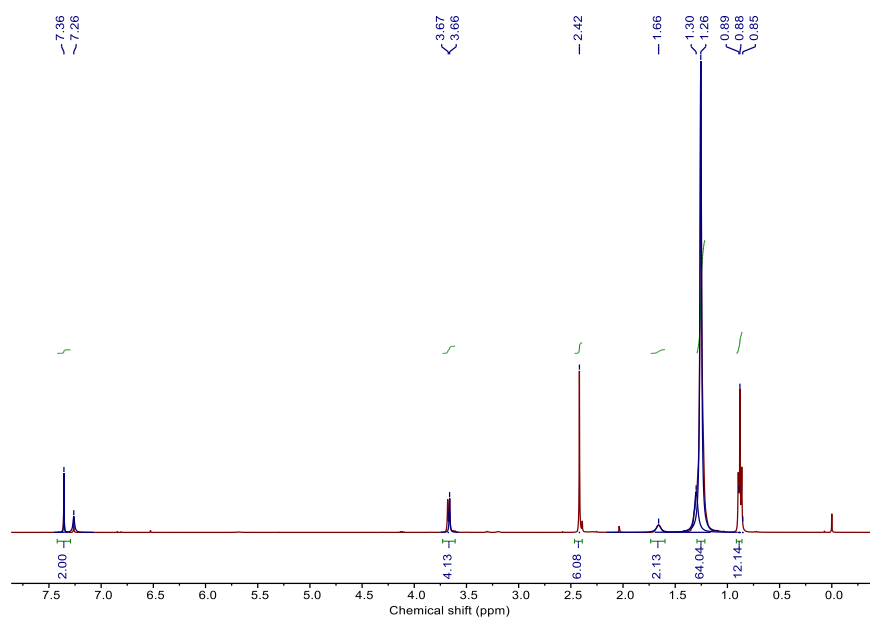

$^1\text{H}$  NMR (400 MHz,  $\text{CDCl}_3$ , ppm): 7.36 (s, 2H), 3.66 (d,  $J = 7.5$  Hz, 4H), 2.42 (s, 6H), 1.70–1.60 (m, 2H), 1.40–1.20 (m, 64H), 0.88 (t,  $J = 6.8$  Hz, 12H).

**Figure S4.**  $^{13}\text{C}$  NMR spectrum for compound C.

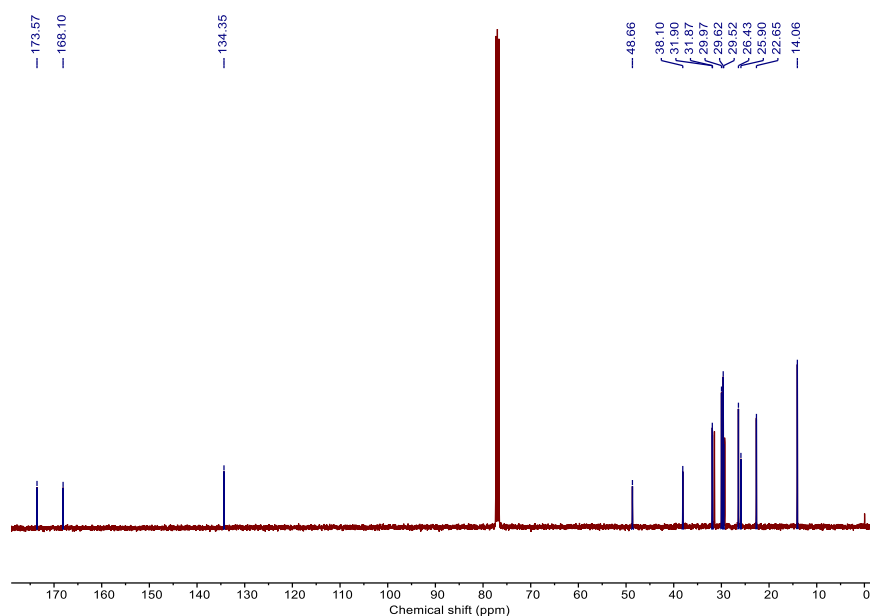

$^{13}\text{C}$  NMR (100 MHz,  $\text{CDCl}_3$ , ppm): 173.57, 168.10, 134.35, 48.66, 38.10, 31.90, 31.87, 29.97, 29.62, 29.52, 26.43, 25.90, 22.65, 14.06.

**Figure S5.**  $^1\text{H}$  NMR spectrum for compound D.

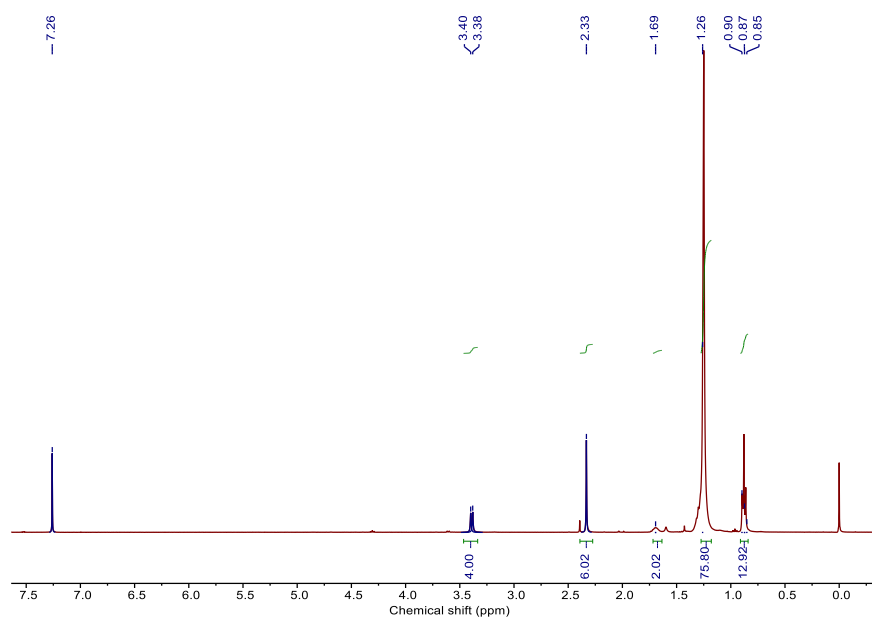

$^1\text{H}$  NMR (400 MHz,  $\text{CDCl}_3$ , ppm): 3.40 (d,  $J = 7.6$  Hz, 4H), 2.33 (s, 6H), 1.74–1.59 (m, 2H), 1.37–1.19 (s, 64H), 0.87 (t,  $J = 6.9$  Hz, 12H).

**Figure S6.**  $^{13}\text{C}$  NMR spectrum for compound D.

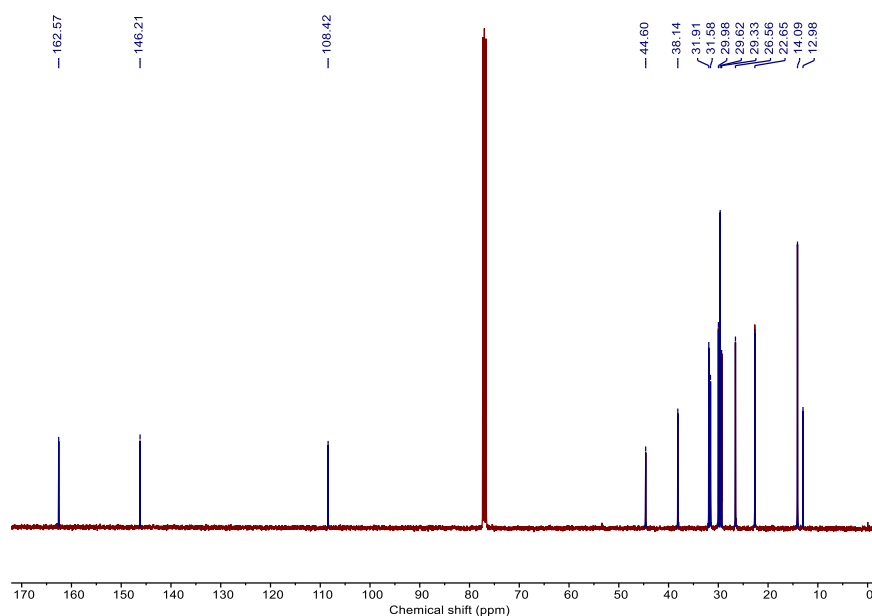

$^{13}\text{C}$  NMR (100 MHz,  $\text{CDCl}_3$ , ppm): 162.57, 146.21, 108.42, 44.60, 38.14, 31.91, 31.58, 29.98, 29.62, 29.33, 26.56, 22.65, 14.09, 12.98.

**Figure S7.**  $^1\text{H}$  NMR spectrum for TVDPP.

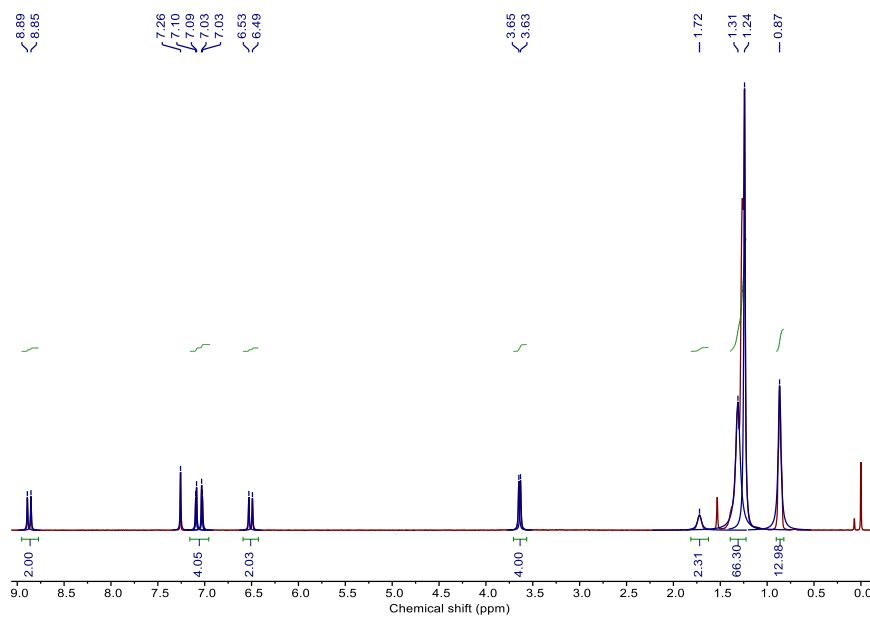

$^1\text{H}$  NMR (400 MHz,  $\text{CDCl}_3$ , ppm): 8.87 (d,  $J = 15.3$  Hz, 2H), 7.10–7.03 (m, 4H), 6.51 (d,  $J = 15.4$  Hz, 2H), 3.64 (d,  $J = 7.3$  Hz, 4H), 1.78–1.65 (m, 2H), 1.38–1.20 (m, 64H), 0.87 (t,  $J = 6.9$  Hz, 12H).

**Figure S8.**  $^{13}\text{C}$  NMR spectrum for TVDPP.

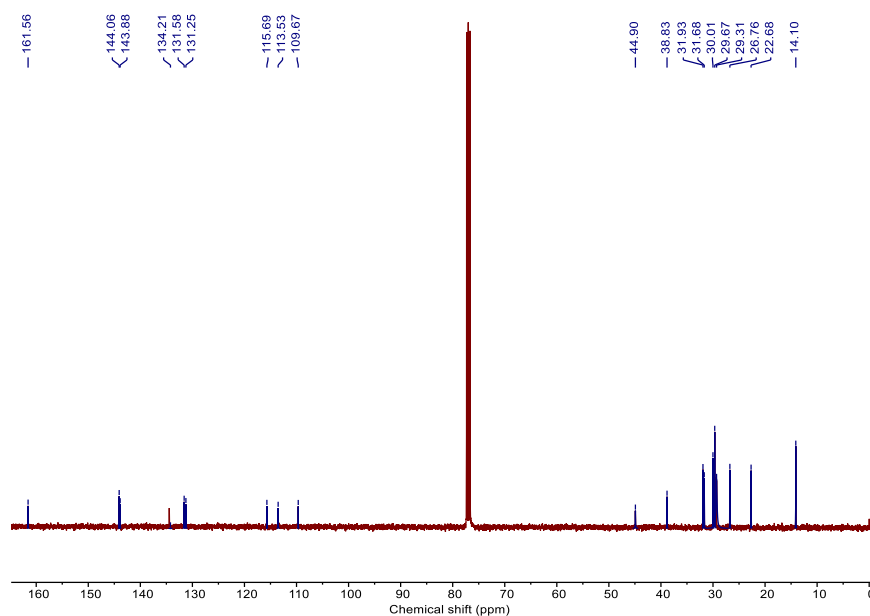

$^{13}\text{C}$  NMR (100 MHz,  $\text{CDCl}_3$ , ppm): 161.56, 144.06, 143.88, 134.21, 131.58, 131.25, 115.69, 113.53, 109.67, 44.90, 38.83, 31.93, 31.68, 30.01, 29.67, 26.76, 22.68, 14.10.

**Figure S9.** GPC for the polymer.

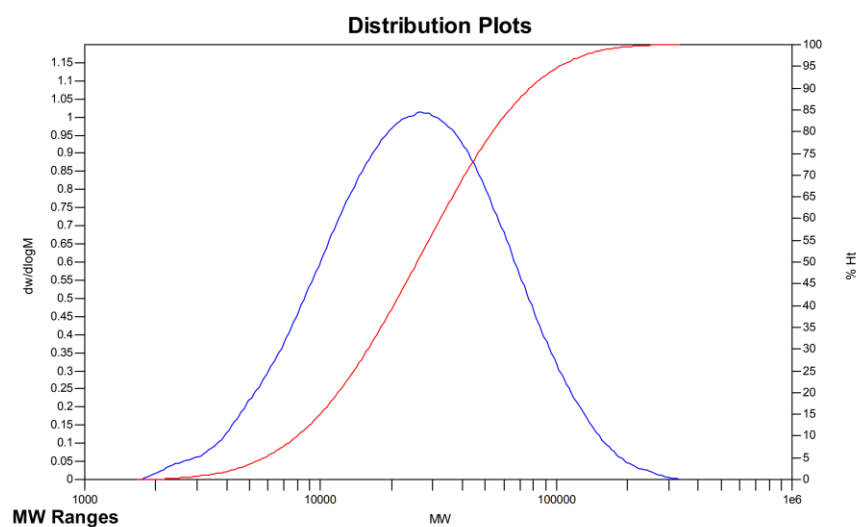

**Figure S10.** TGA curve of the polymer PTVDP-BSz (left) and monomer TVDPP (right).

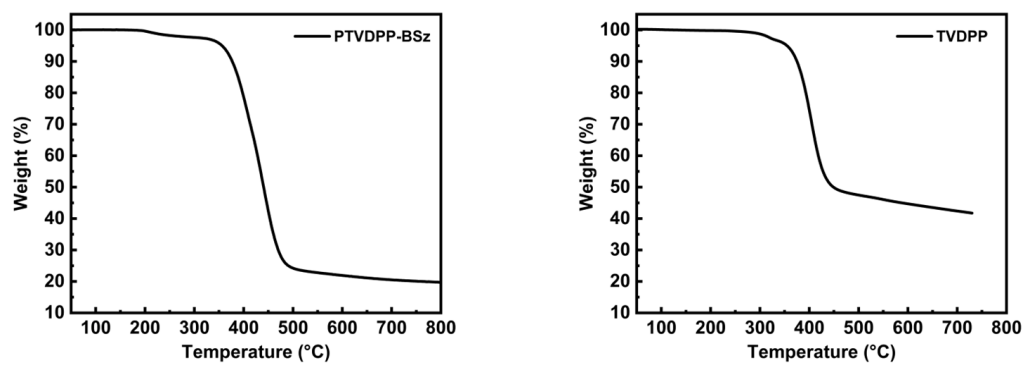

**Figure S11:** Infrared profiles of TVDPP (blue) and PTVDPP-BSz (red)

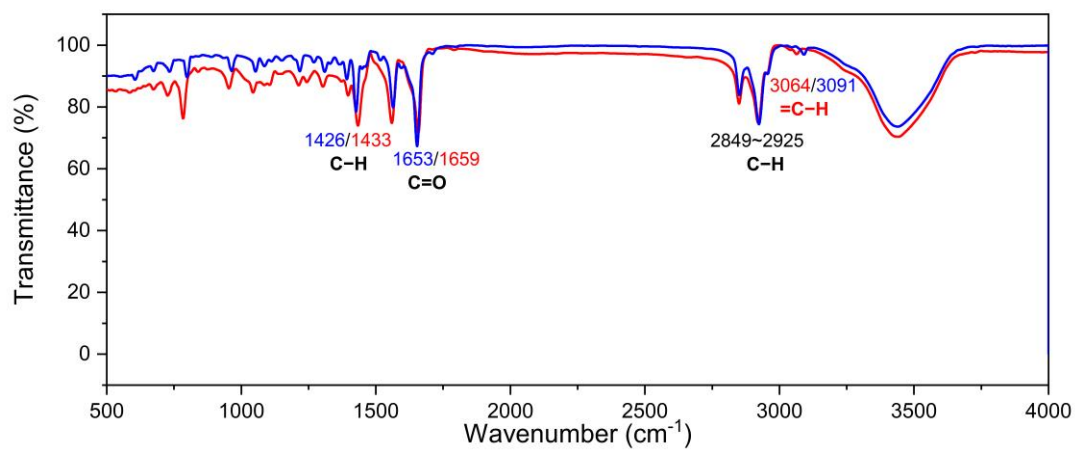

**Figure S12:** UV-vis absorption curve of TVDPP

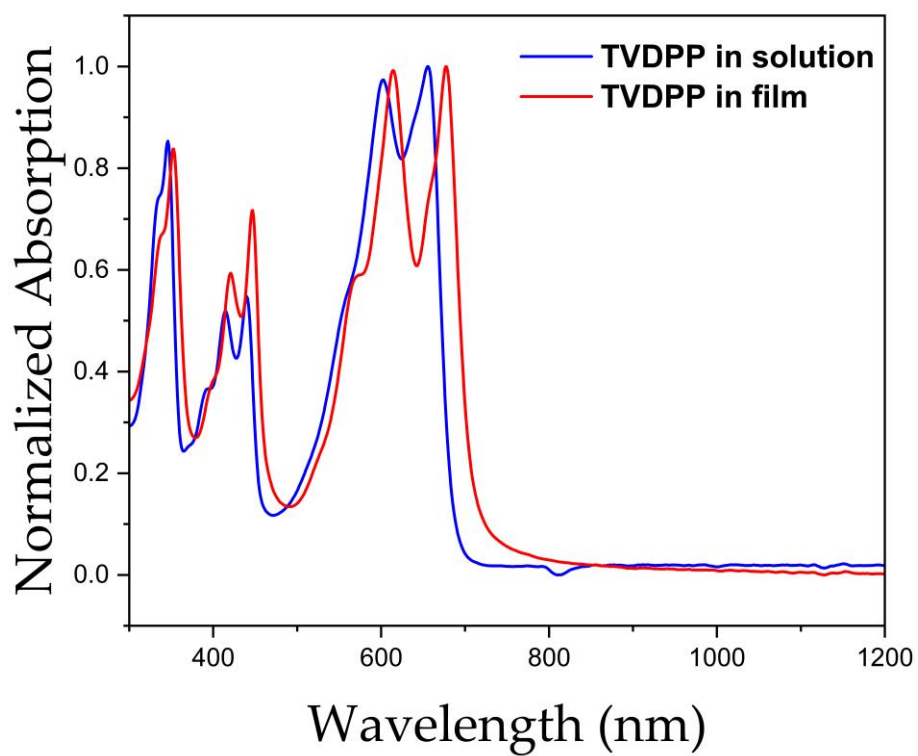

**Figure S13.** The output curves based on the PTVDP-BSz device

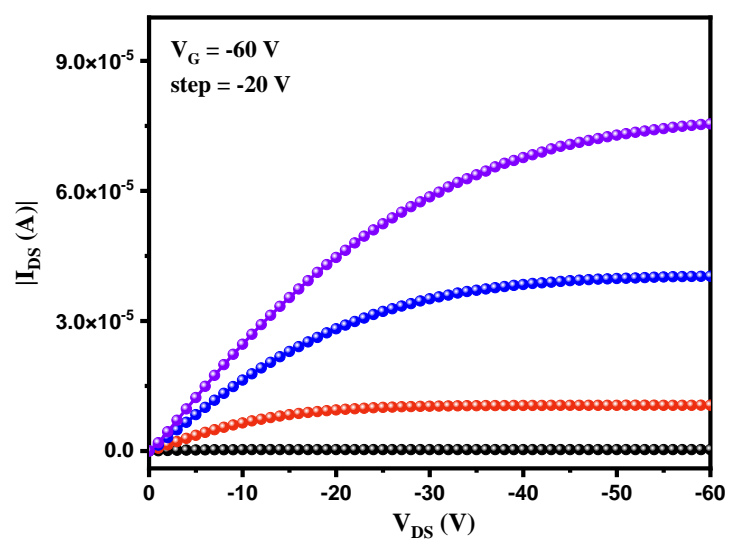

**Figure S14.** 1D-GIWAXS profile of annealed film of PTVDP-BSz.

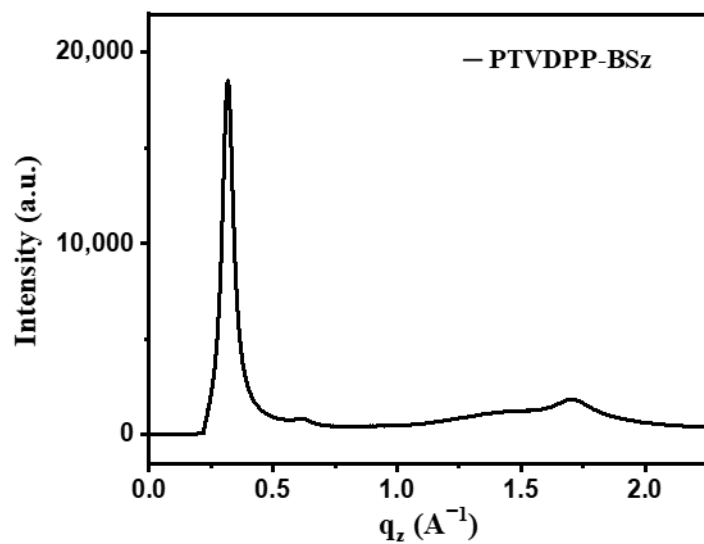

Supplement: s1 [file s1]
